# Supplementary material for: A Specific Circulating MicroRNA Cluster Is Associated to Late Differential Cardiac Response to Doxorubicin-Induced Cardiotoxicity In Vivo
Source: Dis Markers. 2018 Dec 9;2018:8395651. doi: 10.1155/2018/8395651 (PMC6304816; doi:10.1155/2018/8395651)
Supplement: Supplementary 3 — Supplementary Table S1: cardiac function parameters of treated and control animals and p values of performed comparisons. Parameter values are expressed as mean ± SD. [file 8395651.f3.xlsx]

## Sheet: TABLE S1 
Table S1. A) Cardiac function parameters of treated and control animals and B) p values of groups comparisons.
A	Baseline			T42
	CTRL	NoTox	Tox	CTRL	NoTox	Tox
LVEF (%)	83.2 ± 3.3	82.2 ± 4.7	85.5 ± 4.1	80.3 ± 4.8	80.5 ± 4.3	68.4 ± 4.2
LVFS (%)	51.2 ± 3.7	50.2 ± 5.4	54.2 ± 5.2	48.0 ± 5.1	48.6 ± 4.5	37.8 ± 3.5
LVSV (µl)	7.5 ± 2.0	7.8 ± 2.5	5.8 ± 2.2	9.7 ± 2.5	10.6 ± 3.1	20.0 ± 1.7
LVDV (µl)	44.5 ± 7.5	43.3 ± 4.8	39.5 ± 8.9	49.2 ± 6.3	54.1 ± 6.5	64.3 ± 9.5
LVSD (mm)	1.6 ± 0.2	1.6 ± 0.2	1.4 ± 0.2	1.8 ± 0.2	1.8 ± 0.2	2.4 ± 0.1
LVDD (mm)	3.3 ± 0.2	3.3 ± 0.2	3.1 ± 0.3	3.4 ± 0.2	3.6 ± 0.2	3.9 ± 0.2
B	BASELINE			T42			CTRL	NOTOX	TOX
	p(CTRL vs NOTOX)	p(CTRL vs TOX)	p(TOX vs NOTOX)	p(CTRL vs NOTOX)	p(CTRL vs TOX)	p(TOX vs NOTOX)	p(BASELINE vs T42)	p(BASELINE vs T42)	p(BASELINE vs T42)
LVEF	1	0.94	0.85	1	0.0006	0.002	0.64	0.98	4e-05
LVFS	1	0.87	0.77	1	0.008	0.02	0.87	0.99	0.0002
LVSV	1	0.81	0.78	0.98	3e-07	2e-05	0.34	0.44	0
LVDV	1	0.84	0.96	0.81	0.01	0.3	0.67	0.19	0.0003
LVSD	1	0.62	0.61	1	8e-05	0.002	0.28	0.48	5e-07
LVDD	1	0.75	0.92	0.81	0.03	0.42	0.63	0.18	0.0004
LVEF, left ventricular ejection fraction; LVFS, left ventricular fractional shortening; LVSV, left ventricular systolic volume; LVDV, left ventricular diastolic volume; LVSD, left ventricular systolic diameter; LVDD, left ventricular diastolic diameter. CTRL, control group.
