# Supplementary material for: A Specific Circulating MicroRNA Cluster Is Associated to Late Differential Cardiac Response to Doxorubicin-Induced Cardiotoxicity In Vivo
Source: Dis Markers. 2018 Dec 9;2018:8395651. doi: 10.1155/2018/8395651 (PMC6304816; doi:10.1155/2018/8395651)
Supplement: Supplementary 4 — Supplementary Table S2: fold change data of regulated miRNAs. Values are expressed as mean ± SD. [file 8395651.f4.xlsx]

## Sheet: TABLES S2
	Table S2. Fold change data of regulated plasma miRNAs
	T42	CTRL	NoTox	Tox
	miR-1-3p	1.00 ± 0.49	0.97 ± 0.53	0.18 ± 0.06
	miR-34a-5p	1.00 ± 0.24	1.05 ± 0.10	1.59 ± 0.64
	miR-122-5p	1.00 ± 0.45	0.28 ± 0.22	0.67 ± 0.21
	miR-127-3p	1.00 ± 0.58	0.77 ± 0.29	0.46 ± 0.26
	miR-133a-3p	1.00 ± 0.58	1.18 ± 0.65	0.38 ± 0.33
	miR-215-5p	1.00 ± 0.32	0.56 ± 0.22	0.68 ± 0.20
	miR-455-3p	1.00 ± 0.27	0.59 ± 0.20	0.87 ± 0.06
	miR-499a-5p	1.00 ± 0.76	1.16 ± 0.72	0.28 ± 0.03
	Values are expressed as mean fold change ± SD calculated on CTRL
	CTRL n = 10; NoTox n = 5; Tox n = 4.
